# Supplementary material for: Label-Free Detection of CA19-9 Using a BSA/Graphene-Based Antifouling Electrochemical Immunosensor
Source: MDPI journal article supplement (doi:10.3390/s23249693), 2023-12-08
Supplement: s1 [file s1]

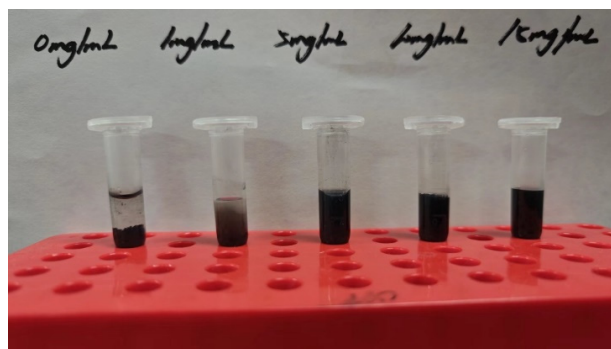

**Figure S1.** Comparison of BSA/Graphene nanocomposites with different BSA concentrations. The concentration of BSA in the samples are 0 mg/mL, 1 mg/mL, 5 mg/mL, 10 mg/mL, and 15 mg/mL, respectively.

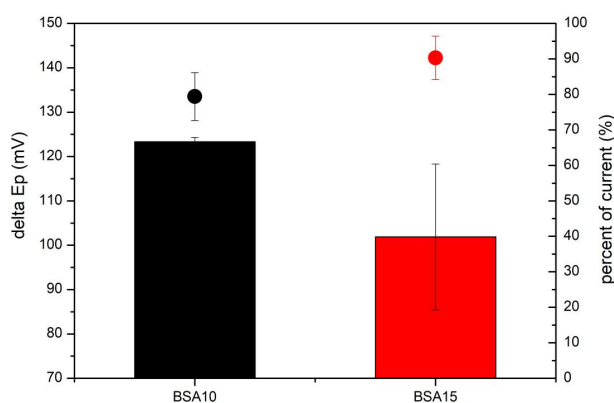

**Figure S2.** Statistical results of delta  $E_p$  and current change after BSA-Graphene-GA modification of AuEs. Columns denote delta  $E_p$  after modification, and dots denote the current percent.

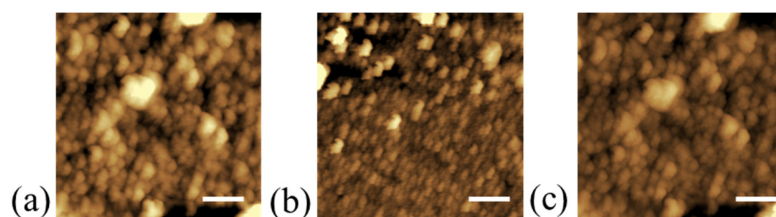

**Figure S3.** AFM images of BSA/Graphene/GA modified gold electrode (a), after anti-CA19-9 antibody capture on BSA/Graphene/GA modified gold electrode (b), and after antigen (100 U/mL) capture on BSA/Graphene/GA modified gold electrode (c). Scale bar 400 nm.

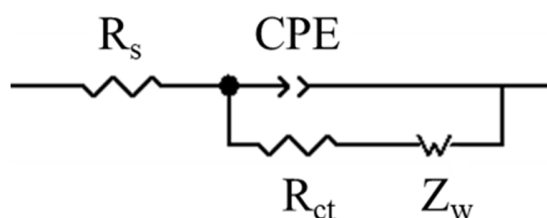

**Figure S4.** The modified Randles circuit model to fit the electrochemical impedance data.

**Table S1.** Comparison of this electrochemical immunosensor with previous reported biosensors for CA19-9 detection.

| Electrode modification                      | Technique | Detection range (U/mL) | LOD (U/mL) | Ref.      |
|---------------------------------------------|-----------|------------------------|------------|-----------|
| GE/anti CA19-9/TiO <sub>2</sub> -SAb19-9-MB | DPV       | 1~100                  | 1.6        | [31]      |
| Zn-Co-S/graphene                            | LSV       | 6.3~300                | 0.82       | [32]      |
| HPR-CA19-9/Au-CPE                           | EIS       | 2~30                   | 1.37       | [33]      |
| CB-polyelectrolyte/anti CA19-9              | DPV       | 0.01~40                | 0.07       | [5]       |
| PThi-SDS/AuNPs                              | EIS       | 5~400                  | 0.45       | [34]      |
| MXene/HRP/anti CA19-9                       | DPV       | 0.002~30               | 0.001      | [28]      |
| BSA15/Graphene/GA/anti CA19-9               | EIS       | 6.25~1000              | 13.5       | This work |
